# Supplementary material for: Cardiac TdP risk stratification modelling of anti-infective compounds including chloroquine and hydroxychloroquine
Source: PubMed Central journal article supplement (PMC8059594; doi:10.1098/rsos.210235), 2021-04-13
Supplement: rsos210235_review_history.pdf [file rsos210235_review_history.pdf]

## **Cardiac TdP risk stratification modelling of anti-infective compounds including chloroquine and hydroxychloroquine**

Dominic G. Whittaker, Rebecca A. Capel, Maurice Hendrix, Xin Hui S. Chan, Neil Herring, Nicholas J. White, Gary R. Mirams and Rebecca-Ann B. Burton

### **Article citation details**

*R. Soc. open sci.* **8**: 210235.

<http://dx.doi.org/10.1098/rsos.210235>

### **Review timeline**

Original submission: 9 February 2021

Final acceptance: 30 March 2021

Note: Reports are unedited and appear as submitted by the referee. The review history appears in chronological order.

Note: This manuscript was transferred from another Royal Society journal with peer review.

## Review History

### RSOS-210235.R0 (Original submission)

#### Review form: Reviewer 1

**Is the manuscript scientifically sound in its present form?**

Yes

**Are the interpretations and conclusions justified by the results?**

Yes

**Is the language acceptable?**

Yes

**Do you have any ethical concerns with this paper?**

No

**Have you any concerns about statistical analyses in this paper?**

No

**Recommendation?**

Accept as is

**Comments to the Author(s)**

Authors replied to all my comments and clarified doubts. Manuscript is ready to be published. Good luck!

**Decision letter (RSOS-210235.R0)**

We hope you are keeping well at this difficult and unusual time. We continue to value your support of the journal in these challenging circumstances. If Royal Society Open Science can assist you at all, please don't hesitate to let us know at the email address below.

Dear Dr Burton:

I am pleased to inform you that your manuscript entitled "Cardiac TdP Risk Stratification Modelling of Anti-Infective Compounds including Chloroquine and Hydroxychloroquine" is now accepted for publication in Royal Society Open Science.

Please ensure that you send to the editorial office an editable version of your accepted manuscript, and individual files for each figure and table included in your manuscript. You can send these in a zip folder if more convenient. Failure to provide these files may delay the processing of your proof.

Additionally, at this stage, we ask that you please archive your GitHub code within the Zenodo repository: <https://guides.github.com/activities/citable-code/> <https://guides.github.com/activities/citable-code/> <https://guides.github.com/activities/citable-code/>. By doing this, a formal, citable DOI will be associated with your data record, and an open license (CC-BY preferred) can be applied to your data. We can then update your data availability statement to read as:

All simulation data and codes required to run the simulations are freely available in the Github repository: <https://github.com/CardiacModelling/risk-stratification-anti-malarial>, and have been archived within the Zenodo repository: <https://doi.org/zenodo...> <https://doi.org/zenodo...> [ref number].

Please could you kindly reply to this email and provide the Zenodo DOI once you have done this? At the proofing stage of your manuscript, we would ask that you please then add the full citation of the Zenodo dataset to the end of your main References list at the end of your manuscript. Data references in Royal Society journals are in the Vancouver style, for example:

1. Torres-Campos I, Abram PK, Guerra-Grenier E, Boivin G, Brodeur J. 2016 Data from: A scenario for the evolution of selective egg colouration: the roles of enemy-free space, camouflage, thermoregulation, and pigment limitation. Dryad Digital Repository. (<https://doi.org/10.5061/dryad.5qt2k>).

COVID-19 rapid publication process:

We are taking steps to expedite the publication of research relevant to the pandemic. If you wish, you can opt to have your paper published as soon as it is ready, rather than waiting for it to be published the scheduled Wednesday.

This means your paper will not be included in the weekly media round-up which the Society sends to journalists ahead of publication. However, it will still appear in the COVID-19 Publishing Collection which journalists will be directed to each week (<https://royalsocietypublishing.org/topic/special-collections/novel-coronavirus-outbreak>).

If you wish to have your paper considered for immediate publication, or to discuss further, please notify [openscience\\_proofs@royalsociety.org](mailto:openscience_proofs@royalsociety.org) and [press@royalsociety.org](mailto:press@royalsociety.org) when you respond to this email.

You can expect to receive a proof of your article in the near future. Please contact the editorial office ([openscience@royalsociety.org](mailto:openscience@royalsociety.org)) and the production office ([openscience\\_proofs@royalsociety.org](mailto:openscience_proofs@royalsociety.org)) to let us know if you are likely to be away from e-mail contact -- if you are going to be away, please nominate a co-author (if available) to manage the proofing process, and ensure they are copied into your email to the journal. Due to rapid publication and an extremely tight schedule, if comments are not received, your paper may experience a delay in publication.

Please see the Royal Society Publishing guidance on how you may share your accepted author manuscript at <https://royalsociety.org/journals/ethics-policies/media-embargo/>. After publication, some additional ways to effectively promote your article can also be found here <https://royalsociety.org/blog/2020/07/promoting-your-latest-paper-and-tracking-your-results/>.

On behalf of the Editors of Royal Society Open Science, thank you for your support of the journal and we look forward to your continued contributions to Royal Society Open Science.

Best regards,

Lianne Parkhouse  
Editorial Coordinator  
Royal Society Open Science  
[openscience@royalsociety.org](mailto:openscience@royalsociety.org)

on behalf of Dr Francois Fages (Associate Editor) and Professor Kevin Padian (Subject Editor).

Associate Editor Dr Francois Fages Comments to Author:

Dear Authors

It is my pleasure to inform you that your manuscript is accepted as is in RSOS.

Congratulations for this manuscript revision.

Best regards

Reviewer(s)' Comments to Author:

Reviewer: 1

Comments to the Author(s)

Authors replied to all my comments and clarified doubts. Manuscript is ready to be published. Good luck!

Follow Royal Society Publishing on Twitter: @RSocPublishing

Follow Royal Society Publishing on Facebook:

<https://www.facebook.com/RoyalSocietyPublishing.FanPage/>

Read Royal Society Publishing's blog:

<https://royalsociety.org/blog/blogsearchpage/?category=Publishing>
